# Supplementary material for: Upregulated TSG-6 Expression in ADSCs Inhibits the BV2 Microglia-Mediated Inflammatory Response
Source: Hindawi journal article supplement (doi:10.1155/2018/7239181), 2018-11-21
Supplement: f1 [file 7239181.f1.zip]

## 1. Primer sequences:

| Gene  | Forward (top) Reverse (bottom)                                        | size (bp) |
|-------|-----------------------------------------------------------------------|-----------|
| GAPDH | 5'- CCATGTTTCGTCATGGGTGTGAACCA-3'<br>5'- GCCAGTAGAGGCAGGGATGATGTTC-3' | 189       |
| TSG-6 | 5'- GCTACAACCCGAACGCAAAG-3'<br>5'- TACAAAGCCGTGGACATCGT-3'            | 251       |

| Gene         | Forward (top) Reverse (bottom)                                        | Size (bp) |
|--------------|-----------------------------------------------------------------------|-----------|
| GAPDH        | 5'- CCATGTTTCGTCATGGGTGTGAACCA-3'<br>5'- GCCAGTAGAGGCAGGGATGATGTTC-3' | 189       |
| IL-1b        | 5'- GCTACAACCCGAACGCAAAG-3'<br>5'- TACAAAGCCGTGGACATCGT-3'            | 104       |
| IL-6         | 5'-CGGAGAGGAGACTTCACAGAG-3'<br>5'-CATTTCACGATTTCACAGA-3'              | 105       |
| TNF $\alpha$ | 5'-TATGGCTCAGGGTCCAACTC-3'<br>5'-GGAAAGCCCATTTGAGTCCT-3'              | 126       |
| iNOS         | 5'-CCAGAAGCAGAATGTGACCA-3'<br>5'-GGACCAGCCAAATCCAGTC-3'               | 119       |

## Reaction condition:

95°C 3 min; 95°C 5s, 60°C 30s, 72°C 30 s; 40 cycles, 95°C 10s, 65°C to 95.0°C

## 2. miR-214-5p primer sequence

| Gene                               | Forward (top) Reverse (bottom)                                  |
|------------------------------------|-----------------------------------------------------------------|
| U6 primer                          | 5'-CGCTTCGGCAGCACATATAC-3'<br>5'-AAATATGGAACGCTTCACGA-3'        |
| miR-214-5p loop primer             | 5'-GTCGTATCCAGTGCAGGGTCCGAGGTATTCTG<br>CACTGGATACGAC AGACACAT   |
| miR-214-5p antisense strand primer | F primer: TGCGCAGAGTTGTCATG<br>R primer: CCAGTGCAGGGTCCGAGGTATT |

## Reaction condition:

50°C 2 min, 95°C 10min; 95°C 30 sec , 60°C 30 sec, 40 cycles

3. TSG-6-siRNA sequence:

Target sequence: CCTTGAAGTTTCTGAGTGA

sense strand (5'-3')                      5' CCUUGAAGUUUCUGAGUGA dTdT 3'

antisense strand (3'-5')                3' dTdT GGAACUUCAAAGACUCACU 5'

4. miR-214-5p sequence: agaguugucaugugucu

miR-214-5p mimic is a double strand consisting of miR-214-5p sequence and its complementary sequence;

miR-214-5p inhibitor is a single strand consisting of the complementary sequence of miR-214-5p sequence.
